# Supplementary material
Source: Springer Nature journal article supplement (https://www.springermedizin.de/resource/supplementary/12885_2012_3725_MOESM3_ESM.pdf/9465968)

Plasma cytokines

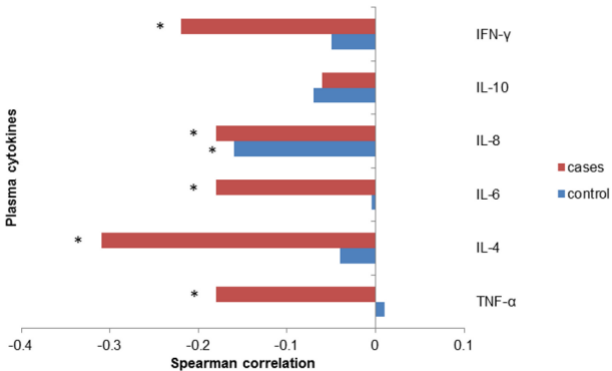

Supplement: MOESM3 [file 9465968]
